# Supplementary material for: Respiratory mechanics measured by forced oscillation technique in rheumatoid arthritis-related pulmonary abnormalities: frequency-dependence, heterogeneity and effects of smoking
Source: PubMed Central journal article supplement (PMC4792822; doi:10.1186/s40064-016-1952-8), 2016-03-15

# Additional file 2: Figure S2

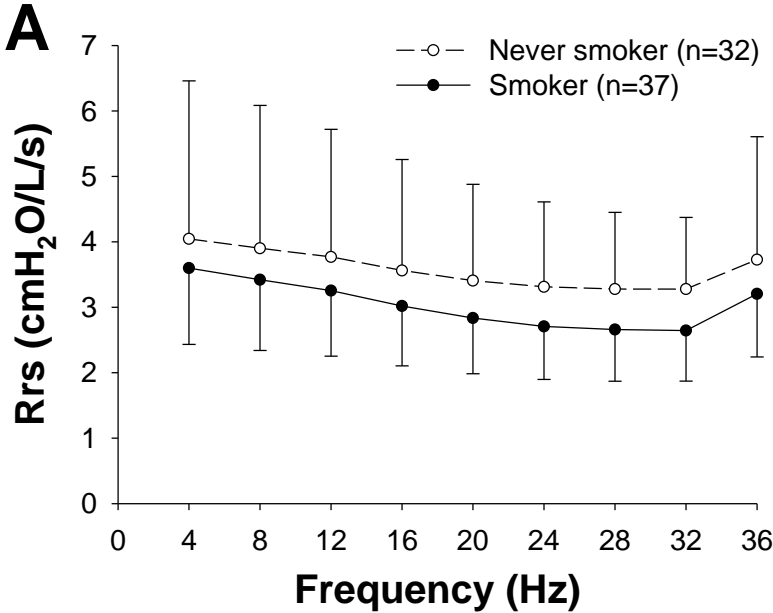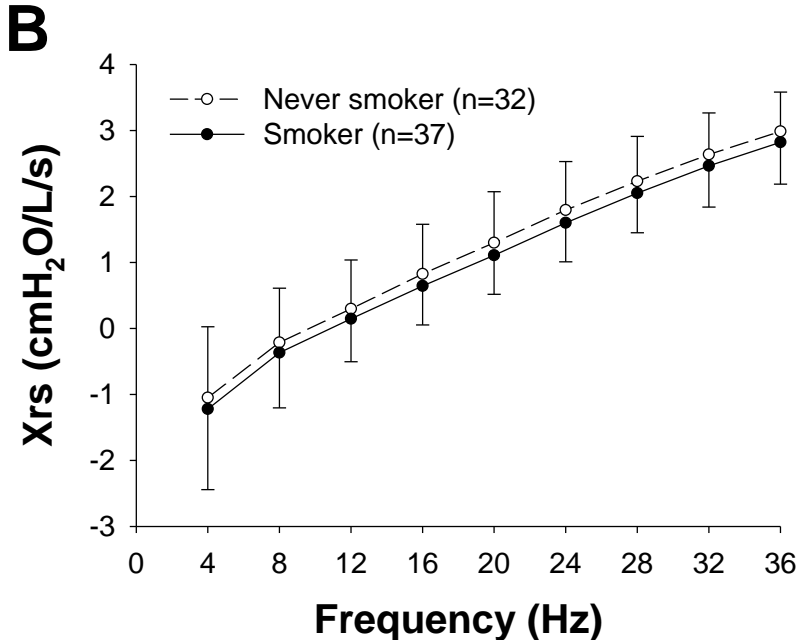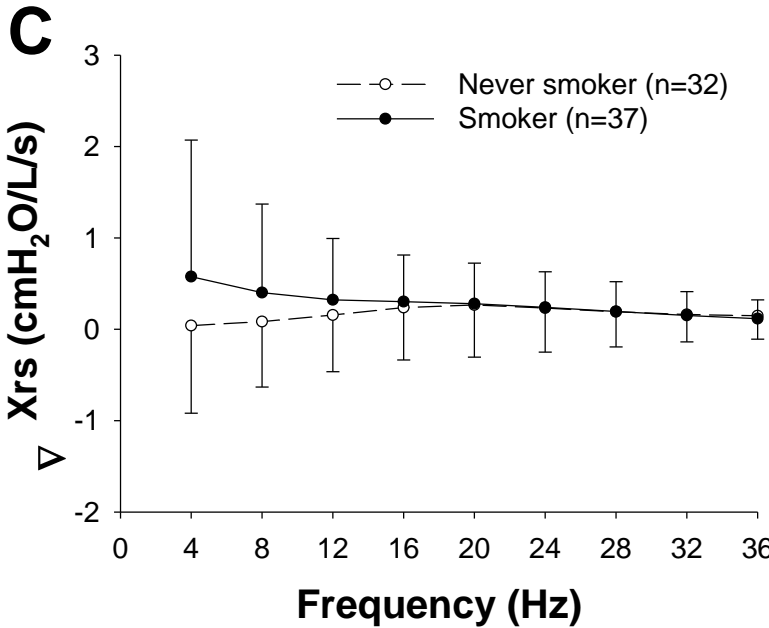

Supplement: 40064_2016_1952_MOESM2_ESM.pdf [file 40064_2016_1952_MOESM2_ESM.pdf]
