# Supplementary material for: Respiratory mechanics measured by forced oscillation technique in rheumatoid arthritis-related pulmonary abnormalities: frequency-dependence, heterogeneity and effects of smoking
Source: PubMed Central journal article supplement (PMC4792822; doi:10.1186/s40064-016-1952-8), 2016-03-15
Supplement: 40064_2016_1952_MOESM3_ESM.pdf [file 40064_2016_1952_MOESM3_ESM.pdf]

**Additional file 3: Table S1.****Clinical characteristics of healthy control subjects**

| Subjects                     | Healthy (n=10)   |
|------------------------------|------------------|
| Age, years (range)           | 38.4±9.6 (24-59) |
| Sex, male/female             | 4/6              |
| Height, cm                   | 164.0±9.3        |
| Weight, kg                   | 59.8±10.2        |
| BMI                          | 22.1±2.0         |
| %VC                          | 105.1±11.3       |
| %FVC                         | 108.2±11.0       |
| %FEV <sub>1</sub>            | 103.8±13.9       |
| FEV <sub>1</sub> /FVC, %     | 82.6±5.8         |
| FEF <sub>25-75</sub> /FVC, % | 90.1±28.1        |
| %FEF <sub>25-75</sub>        | 89.6±30.7        |

Values are mean ± SD.
